# Supplementary material
Source: PubMed Central journal article supplement (PMC2575047)

Supplemental Figure 1A

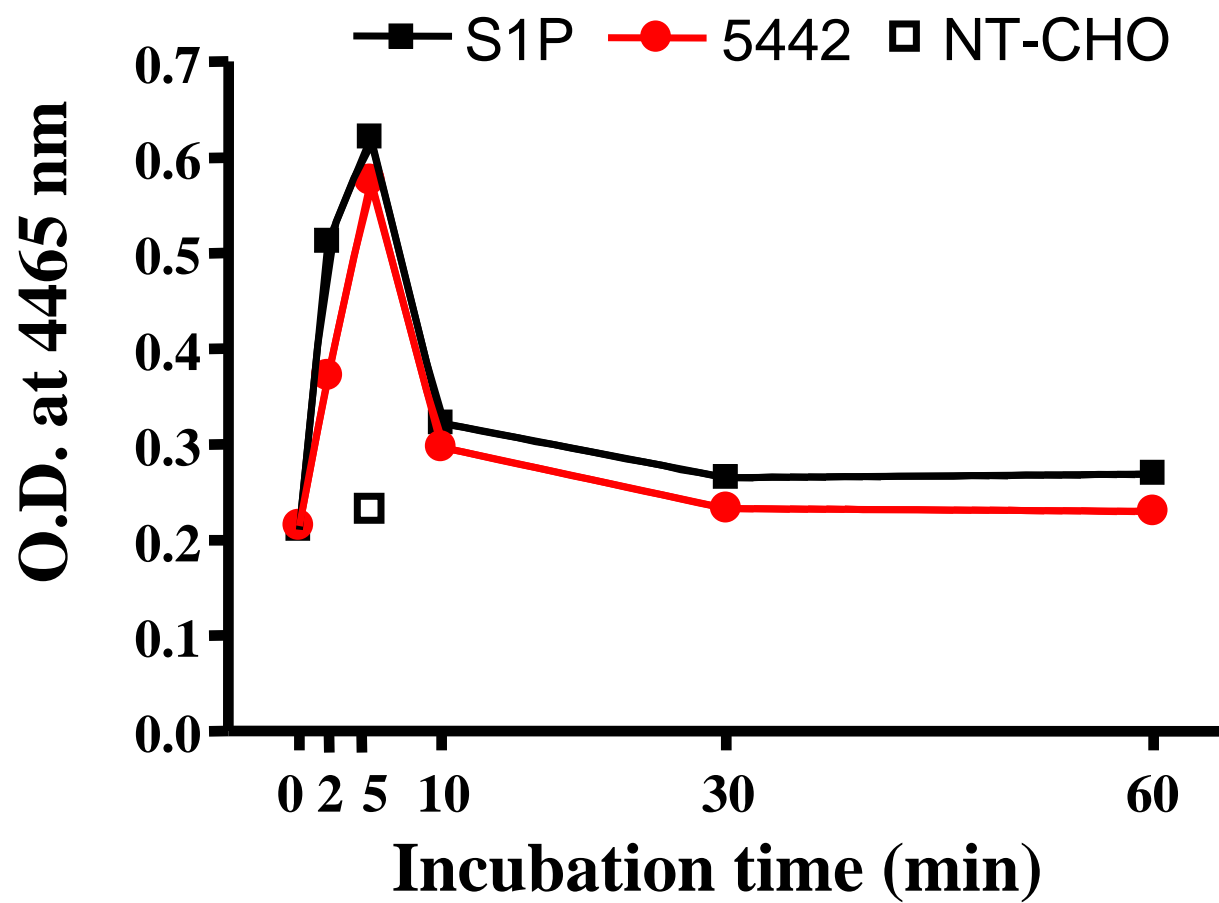

Supplemental Figure 1B

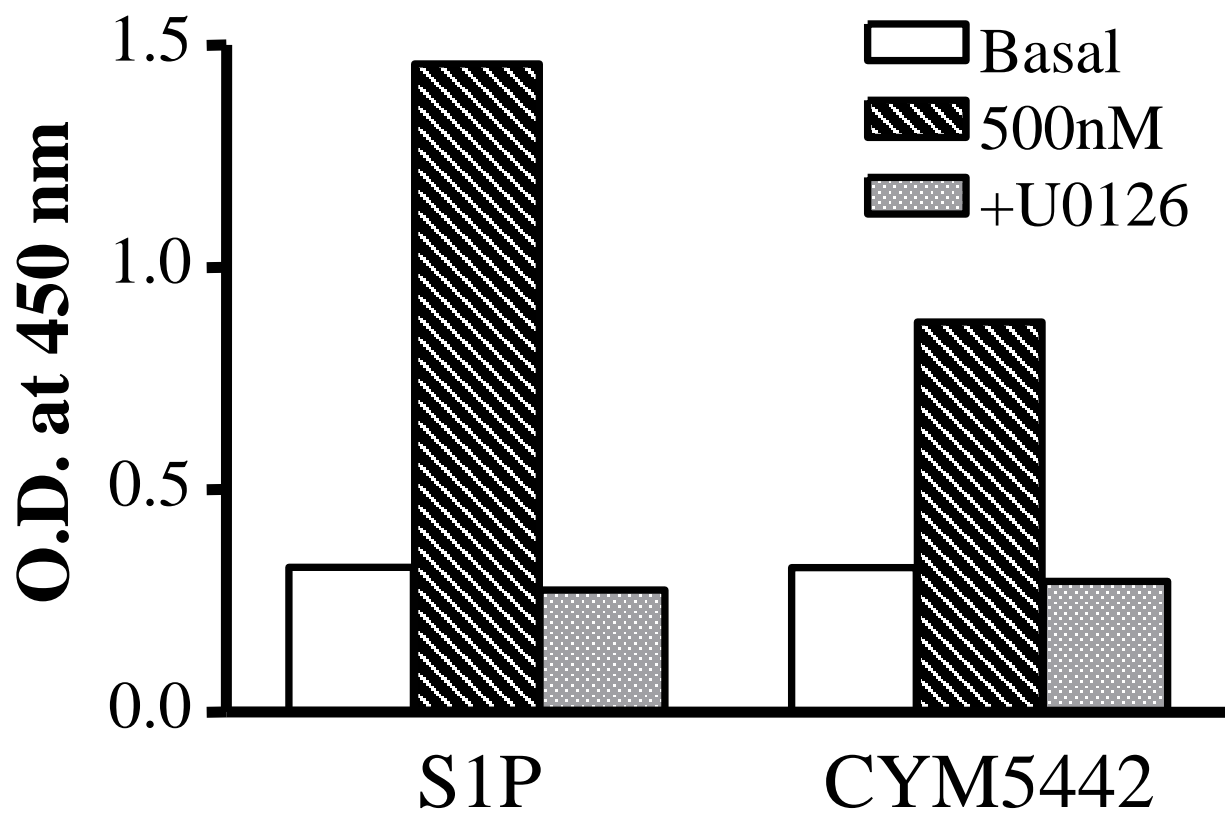

Supplement: NIHMS65934-supplement-supplement_1.pdf [file NIHMS65934-supplement-supplement_1.pdf]
